# Supplementary material for: B-Cell Epitopes in NTS-DBL1α of PfEMP1 Recognized by Human Antibodies in Rosetting Plasmodium falciparum
Source: PubMed Central journal article supplement (PMC4249881; doi:10.1371/journal.pone.0113248), 2014-12-01
Supplement: pone.0113248.s003.pdf [file pone.0113248.s003.pdf]

## Supporting Information

**Table S1 – Experimental and clinical parameters of the plasma samples included in the study.** Summary of parameters of the 74 plasma samples analyzed in the study. RD: ability of the sample to disrupt FCR3S1.2 rosettes (%); MFI: recognition of the FCR3S1.2 iRBC surface by flow cytometry; It4var60 reactivity: ELISA reactivity towards the recombinant NTS-DBL1 $\alpha$ <sup>It4var60</sup> domain.

| Isolates | RD    | MFI     | It4var60 reactivity | Age (months) | Breath | Pulse | Temperature 0°C | Parasites/u L | Glucose (mmol/L) | Hemoglobin (g/L) | Blood Group |
|----------|-------|---------|---------------------|--------------|--------|-------|-----------------|---------------|------------------|------------------|-------------|
| CBM001   | 0,00  |         | 1,16                | 16           | 40     | 112   | 37,9            | 80            | 7,9              | 104              | A           |
| CBM002   | 0,00  |         | 0,81                | 55           | 40     | 120   | 37,6            | 120           | 7,2              | 98               | A           |
| CBM003   | 0,00  |         | 1,46                | 53           | 40     | 100   | 37,9            | 120           | 8,6              | 90               | O           |
| CBM004   | 12,68 | 164,035 | 0,65                | 49           | 30     | 120   | 37,7            | 256000        | 6,2              | 76               | O           |
| CBSr005  | 0,00  |         | 0,50                | 47           | 40     | 140   | 37,6            | 2000          | 5,2              | 92               | O           |
| CBM006   | 2,73  | 7,48    | 0,62                | 36           | 36     | 120   | 37,5            | 200           | 8,2              | 104              | A           |
| CBM007   | 37,17 | 160,45  | 1,17                | 55           | 32     | 100   | 37,5            | 120           | 9,1              | 105              | O           |
| CBSa008  | 0,00  | 88,125  | 0,96                | 10           | 32     | 140   | 37,9            | 6800          | 67               | 29               | AB          |
| CBM009   | 10,16 |         | 0,75                | 84           | 26     | 90    | 36,8            | 1000          | 8,4              | 109              | O           |
| CBM010   | 41,75 |         | 1,40                | 73           | 27     | 100   | 37,1            | 400           | 9,6              | 113              | O           |
| CBM011   | 41,46 |         | 1,56                | 106          | 28     | 100   | 37,6            | 4080          | 8,7              | 126              | O           |
| CBM012   | 23,92 |         | 1,03                | 90           | 32     | 100   | 37,3            | 1840          | 7,7              | 114              | A           |
| CBM013   | 50,90 |         | 1,04                | 91           | 28     | 120   | 40,3            | 6000          | 7,5              | 99               | B           |
| CBM014   | 5,53  | 136,08  | 1,37                | 7            | 40     | 140   | 37,9            | 1440          | 8,3              | 83               | O           |
| CBM015   | 1,06  |         | 1,66                | 51           | 40     | 100   | 37,5            | 400           | 7,3              | 97               | A           |
| CBM020   | 10,65 | 30,6    | 1,47                | 50           | 36     | 100   | 37,1            | 12000         | 8,1              | 106              | O           |
| CBM021   | 9,32  |         | 0,91                | 117          | 28     | 100   | 37,8            | 41680         | 7,1              | 113              | O           |
| CBM022   | 5,57  | 179,635 | 0,61                | 20           | 40     | 120   | 37,7            | 11080         | 8,5              | 74               | O           |
| CBM023   | 2,31  | 91,525  | 0,43                | 84           | 32     | 120   | 38,1            | 15600         | 9,6              | 83               | AB          |
| CBM024   | 0,00  | 101,97  | 1,40                | 66           | 32     | 104   | 37,3            | 23250         | 9,6              | 83               | O           |
| CBM028   | 4,16  | 146,79  | 1,22                | 72           | 28     | 120   | 37,6            | 14086         | 8,8              | 85               | O           |
| CBM029   | 6,19  | 109,46  | 0,54                | 64           | 32     | 128   | 36,8            | 72000         | 8,2              | 100              | A           |
| CBM031   | 8,99  | 109,725 | 1,25                | 152          | 36     | 100   | 37,6            | 17300         | 8,2              | 68               | A           |
| CBM032   | 27,50 | 164,505 | 1,53                | 96           | 24     | 80    | 37,8            | 10000         | 7,4              | 108              | O           |
| CBM033   | 7,65  | 153,395 | 0,34                | 68           | 28     | 108   | 37,6            | 320000        | 7,9              | 121              | O           |
| CBSa035  | 7,78  | 111,45  | 1,20                | 22           | 66     | 88    | 39,2            |               |                  | 39               | A           |
| CBM036   | 93,08 | 306,13  | 1,73                | 60           | 28     | 100   | 37,6            | 9500          | 8,2              | 98               | O           |
| CBM037   | 7,60  | 33,375  | 0,84                | 50           | 34     | 110   | 38,8            | 14640         | 10,1             | 94               | A           |
| CBM040   | 2,69  | 108,575 | 0,56                | 36           | 56     | 120   | 40,2            | 210000        | 8,3              | 105              | O           |
| CBM041   | 51,97 | 352,39  | 1,30                | 119          | 32     | 84    | 37,3            | 10820         | 7,8              | 120              | A           |

|         |       |         |      |     |    |     |      |        |      |     |    |  |
|---------|-------|---------|------|-----|----|-----|------|--------|------|-----|----|--|
| CBM042  |       |         |      |     |    |     |      |        |      |     |    |  |
|         | 45,37 |         | 0,63 | 21  | 36 | 108 | 37,3 | 22440  | 8,4  | 90  | O  |  |
| CBM043  |       |         |      |     |    |     |      |        |      |     |    |  |
|         | 20,35 | 283,81  | 1,07 | 41  | 40 | 120 | 37,7 | 11080  | 7,5  | 101 | O  |  |
| CBM045  |       |         |      |     |    |     |      |        |      |     |    |  |
|         | 11,15 |         | 0,82 | 41  | 40 | 120 | 37,5 | 84920  | 9,6  | 124 | O  |  |
| CBM046  |       |         |      |     |    |     |      |        |      |     |    |  |
|         | 9,26  | 189,515 | 0,77 | 59  | 32 | 100 | 37,5 | 10900  | 7,5  | 101 | B  |  |
| CBSa047 |       |         |      |     |    |     |      |        |      |     |    |  |
|         | 7,80  | 6,5     | 0,75 | 88  | 40 | 140 | 40,4 | 27850  | 8,1  | 55  | O  |  |
| CBM048  |       |         |      |     |    |     |      |        |      |     |    |  |
|         | 11,74 | 155,595 | 1,00 | 10  | 40 | 132 | 37,6 |        | 10,6 | 85  | O  |  |
| CBSa053 |       |         |      |     |    |     |      |        |      |     |    |  |
|         | 0,00  |         | 0,36 | 36  | 24 | 83  | 40   |        |      | 51  | O  |  |
| CBM054  |       |         |      |     |    |     |      |        |      |     |    |  |
|         | 16,79 | 222     | 1,09 | 59  | 44 | 120 | 40   | 10300  | 8,1  | 94  | B  |  |
| CBM056  |       |         |      |     |    |     |      |        |      |     |    |  |
|         | 0,00  | 233,945 | 0,45 | 35  | 44 | 160 | 38,9 | 27300  | 8,6  | 75  | A  |  |
| CBSr060 |       |         |      |     |    |     |      |        |      |     |    |  |
|         | 7,59  | 12,7    | 0,76 | 62  | 30 | 120 | 38,5 |        |      | 96  | B  |  |
| CBM063  |       |         |      |     |    |     |      |        |      |     |    |  |
|         | 0,00  | 106,845 | 1,15 | 11  | 36 | 136 | 38,9 | 294000 | 9,3  | 86  | O  |  |
| CBM064  |       |         |      |     |    |     |      |        |      |     |    |  |
|         | 7,48  | 89,775  | 0,51 | 81  | 32 | 140 | 39,2 | 11200  | 7,9  | 121 | O  |  |
| CBSa065 |       |         |      |     |    |     |      |        |      |     |    |  |
|         | 31,08 |         | 0,46 | 89  | 28 | 136 | 39,5 | 25060  | 6,7  | 50  | O  |  |
| CBM066  |       |         |      |     |    |     |      |        |      |     |    |  |
|         | 62,75 |         | 0,78 | 30  | 40 | 112 | 37,6 | 145000 | 7,3  | 74  | A  |  |
| CBM068  |       |         |      |     |    |     |      |        |      |     |    |  |
|         | 66,44 | 336,45  | 1,45 | 27  | 40 | 120 | 37,3 | 10900  | 7,8  | 94  | B  |  |
| CBM069  |       |         |      |     |    |     |      |        |      |     |    |  |
|         | 0,00  |         | 0,29 | 63  | 24 | 112 | 37,2 | 39200  | 8,8  | 75  | A  |  |
| CBM072  |       |         |      |     |    |     |      |        |      |     |    |  |
|         | 53,30 | 206,61  | 0,58 | 86  | 25 | 135 | 40,5 | 34180  | 9,2  | 92  | B  |  |
| CBM073  |       |         |      |     |    |     |      |        |      |     |    |  |
|         | 14,34 |         | 1,02 | 42  | 30 | 140 | 38   | 16400  | 8,2  | 102 | O  |  |
| CBM074  |       |         |      |     |    |     |      |        |      |     |    |  |
|         | 22,25 | 194,95  | 0,54 | 24  | 25 | 130 | 40,8 | 34900  | 7,6  | 65  | B  |  |
| CBM075  |       |         |      |     |    |     |      |        |      |     |    |  |
|         | 10,57 | 185,385 | 1,22 | 26  | 25 | 180 | 40,5 |        | 6,1  | 109 | AB |  |
| CBM077  |       |         |      |     |    |     |      |        |      |     |    |  |
|         | 0,62  | 87,06   | 1,03 | 62  | 28 | 100 | 40   |        |      | 109 | A  |  |
| CBM078  |       |         |      |     |    |     |      |        |      |     |    |  |
|         | 8,09  |         | 0,49 | 27  | 44 | 100 | 36,5 | 96000  | 8,1  | 89  | A  |  |
| CBM079  |       |         |      |     |    |     |      |        |      |     |    |  |
|         | 28,58 |         | 0,43 | 60  | 40 | 120 | 38,8 | 57300  | 7,1  | 109 | A  |  |
| CMB080  |       |         |      |     |    |     |      |        |      |     |    |  |
|         | 4,42  | 142,025 | 1,11 | 63  | 40 | 120 | 39,4 | 282660 | 6    | 96  | O  |  |
| CBM081  |       |         |      |     |    |     |      |        |      |     |    |  |
|         | 26,97 | 163,685 | 0,94 | 172 | 36 | 128 | 38,5 | 19250  | 7,6  | 107 | A  |  |
| CBM083  |       |         |      |     |    |     |      |        |      |     |    |  |
|         | 6,11  | 133,15  | 0,65 | 51  | 42 | 110 | 38   | 42100  | 8,6  | 84  | B  |  |
| CBM084  |       |         |      |     |    |     |      |        |      |     |    |  |
|         | 0,00  | 80,11   | 0,63 | 32  | 40 | 80  | 38,5 | 155000 | 11,5 | 105 | B  |  |
| CBM086  |       |         |      |     |    |     |      |        |      |     |    |  |
|         | 0,58  | 150,27  | 1,01 | 60  | 30 | 86  | 38,1 | 14780  | 6,6  | 100 | O  |  |
| CBSa088 |       |         |      |     |    |     |      |        |      |     |    |  |
|         | 11,63 | 119,08  | 0,48 | 35  | 30 | 160 | 37,5 |        |      | 47  | O  |  |
| CBSa089 |       |         |      |     |    |     |      |        |      |     |    |  |
|         | 4,20  | 4,4     | 0,95 | 25  | 20 | 120 | 39   |        |      | 52  | O  |  |
| CBSa091 |       |         |      |     |    |     |      |        |      |     |    |  |
|         | 8,45  | 5,5     | 0,44 | 19  | 20 | 100 | 38   |        |      | 51  | O  |  |
| CBM138  |       |         |      |     |    |     |      |        |      |     |    |  |
|         | 4,29  | 17,045  | 0,66 | 24  | -  | -   | 37,5 |        |      |     | B  |  |
| CBM139  |       |         |      |     |    |     |      |        |      |     |    |  |
|         | 3,05  | 109,62  | 0,28 | 24  | 30 | 80  | 37,6 | 6700   |      | 76  | O  |  |
| CBSa155 |       |         |      |     |    |     |      |        |      |     |    |  |
|         | 25,83 | 5,495   | 1,07 | 84  | 30 | 88  | 38,8 |        |      | 102 | A  |  |
| CBSa162 |       |         |      |     |    |     |      |        |      |     |    |  |
|         | 5,94  | 85,62   | 1,24 | 20  | 30 | 140 | 40   |        |      | 29  | B  |  |
| CBSa168 |       |         |      |     |    |     |      |        |      |     |    |  |
|         | 19,02 | 8,895   | 1,08 | 13  |    |     | 39,3 |        |      | 31  | O  |  |
| CBCs169 |       |         |      |     |    |     |      |        |      |     |    |  |
|         | 12,51 |         | 0,32 | 36  |    |     | 37,6 | 24000  |      | 63  | O  |  |
| CBM170  |       |         |      |     |    |     |      |        |      |     |    |  |
|         | 6,35  |         | 0,33 | 156 |    |     | 38,6 |        |      | 113 | A  |  |
| CBSa171 |       |         |      |     |    |     |      |        |      |     |    |  |
|         | 9,39  |         | 0,87 | 36  | 24 | 58  | 36,4 |        |      | 50  | O  |  |
| CBM172  |       |         |      |     |    |     |      |        |      |     |    |  |
|         | 16,09 |         | 0,47 |     |    |     |      |        |      | 112 | AB |  |
| CBSa173 |       |         |      |     |    |     |      |        |      |     |    |  |
|         | 8,52  |         | 0,75 | 36  | 30 | 130 | 38,5 |        |      | 36  | A  |  |

|         |      |  |      |     |    |    |      |  |  |    |   |
|---------|------|--|------|-----|----|----|------|--|--|----|---|
| CBM174  | 0,00 |  | 0,35 | 48  | 30 | 98 | 38,5 |  |  | 57 | O |
| CBSa175 | 2,58 |  | 0,39 | 20  |    |    | 37,9 |  |  | 45 | B |
| CBSr176 | 7,21 |  | 0,89 | 110 | 20 | 80 | 40,2 |  |  | 98 | O |
